# Supplementary material for: Catalytic Synthesis of (S)-CHBE by Directional Coupling and Immobilization of Carbonyl Reductase and Glucose Dehydrogenase
Source: MDPI journal article supplement (doi:10.3390/biom14040504), 2024-04-21
Supplement: s1 [file s1]

# Supplementary Materials

## Catalytic Synthesis of (S)-CHBE by Directional Coupling and Immobilization of Carbonyl Reductase and Glucose Dehydrogenase

Yadong Wang <sup>1,2,†</sup>, Ruiqi Sun <sup>1,2,†</sup>, Peng Chen <sup>1,2</sup> and Fenghuan Wang <sup>1,2,\*</sup>

<sup>1</sup> Key Laboratory of Geriatric Nutrition and Health (Beijing Technology and Business University), Ministry of Education, Beijing 100048, China; wangyadong@btbu.edu.cn (Y.W.); srqsp2017@163.com (R.S.); cp15212120947@163.com (P.C.)

<sup>2</sup> School of Light Industry Science and Engineering, Beijing Technology and Business University (BTBU), Beijing 100048, China

\* Correspondence: wangfenghuan@th.btbu.edu.cn; Tel.: +86-10-68985252

† These authors contributed equally to this work.

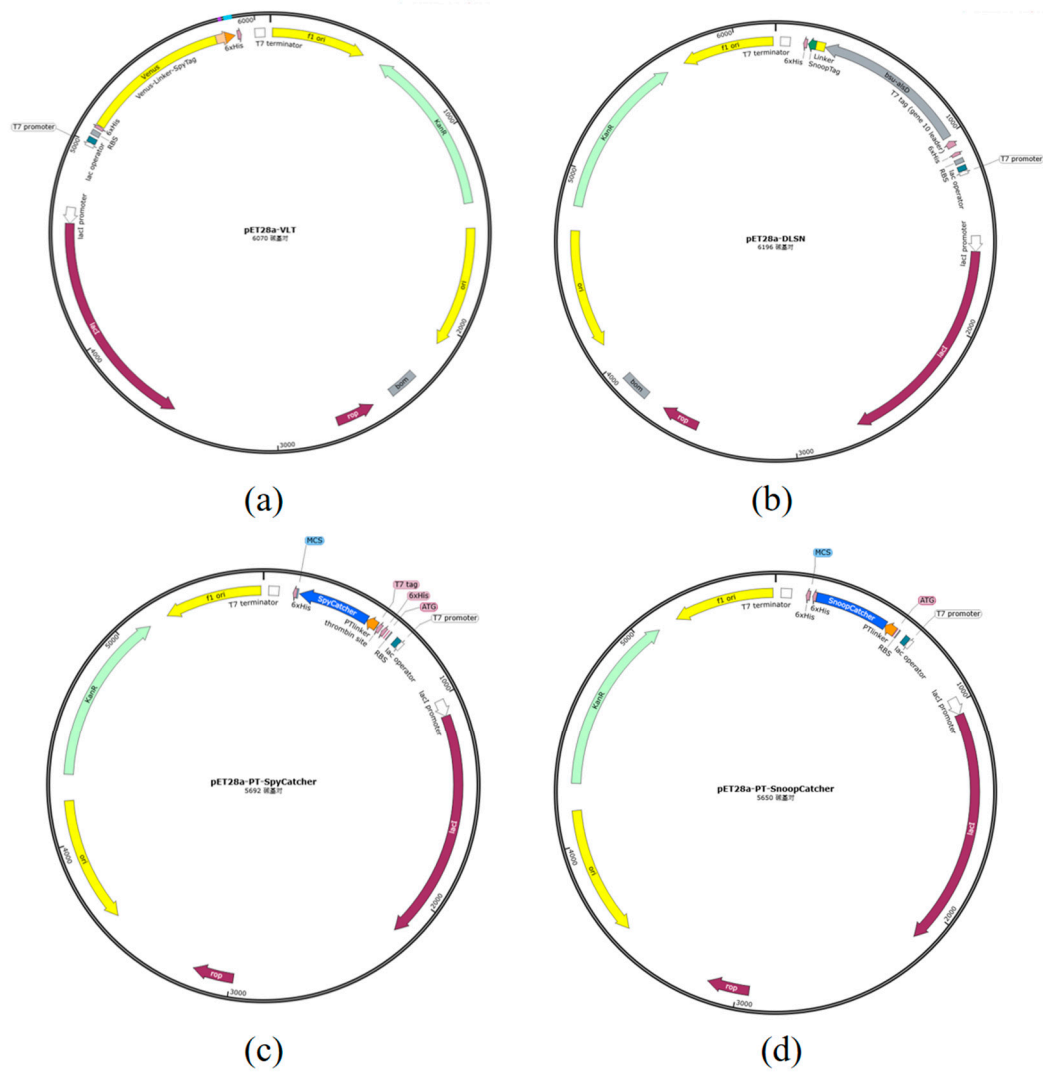

**Figure S1.** The plasmid profiles. (a) pET28a-VLT. (b) pET28a-DLSN. (c) pET28a-SpyCatcher. (d) pET28a-SnoopCatcher.

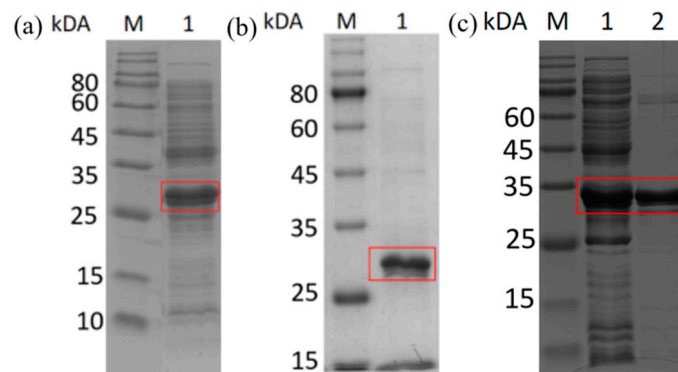

**Figure S2.** SDS-PAGE analysis of recombinant fusion protein expression in E. coli. (a) M: Protein Marker; lane 1: BsCR crude enzyme. (b) M: Protein Marker; lane 1: Purified BsCR enzyme solution. (c) M: Protein Marker; lane 1: BsGDH crude enzyme; lane 2: Purified BsGDH enzyme solution.

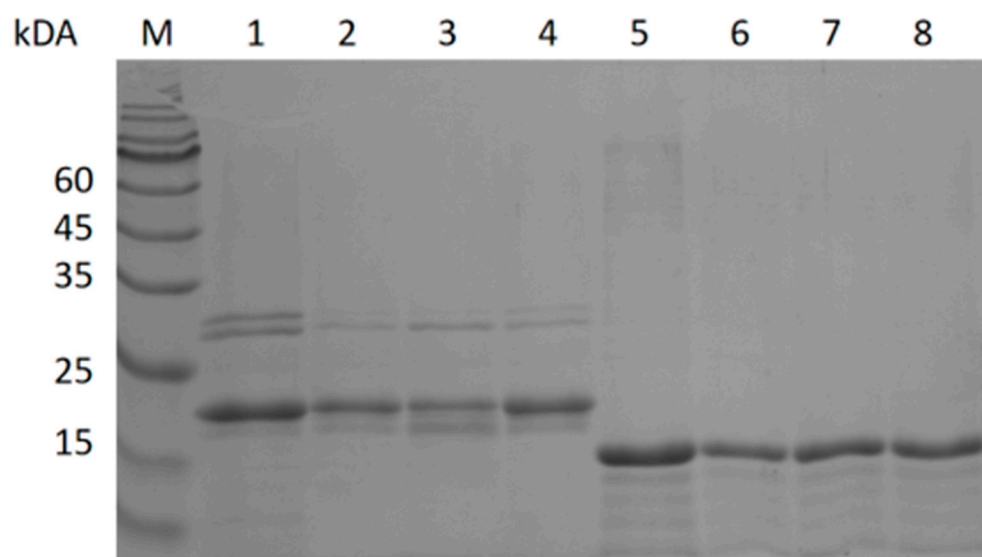

**Figure S3.** SDS-PAGE results of immobilization of purified SpyCatcher and SnoopCatcher ; M: Protein Marker; lane 1: Purified SpyCatcher; lane 2-4: The SpyCatcher supernatant occurred after fixation; lane 5: Purified SnoopCatcher; lane 6-8: SnoopCatcher After fixed supernatant.

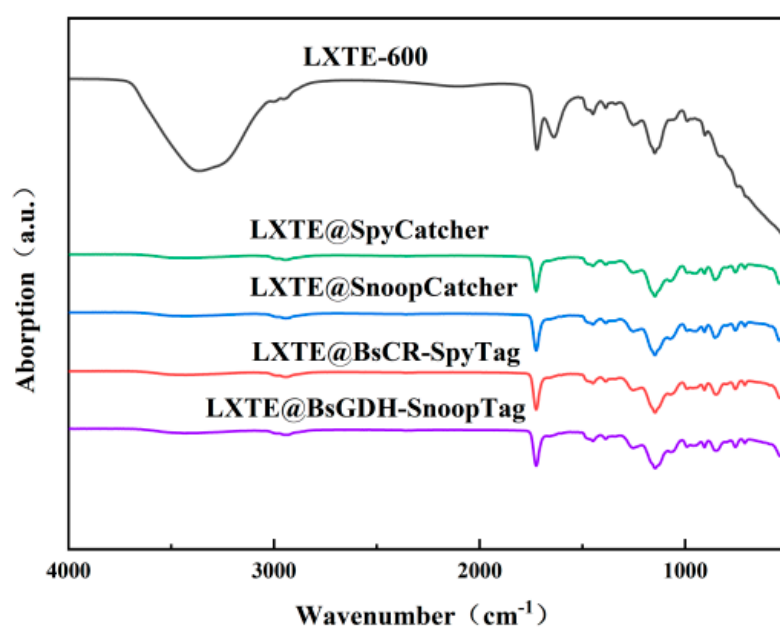

**Figure S4.** FT-IR spectra of the epoxy resin and the immobilized resin.

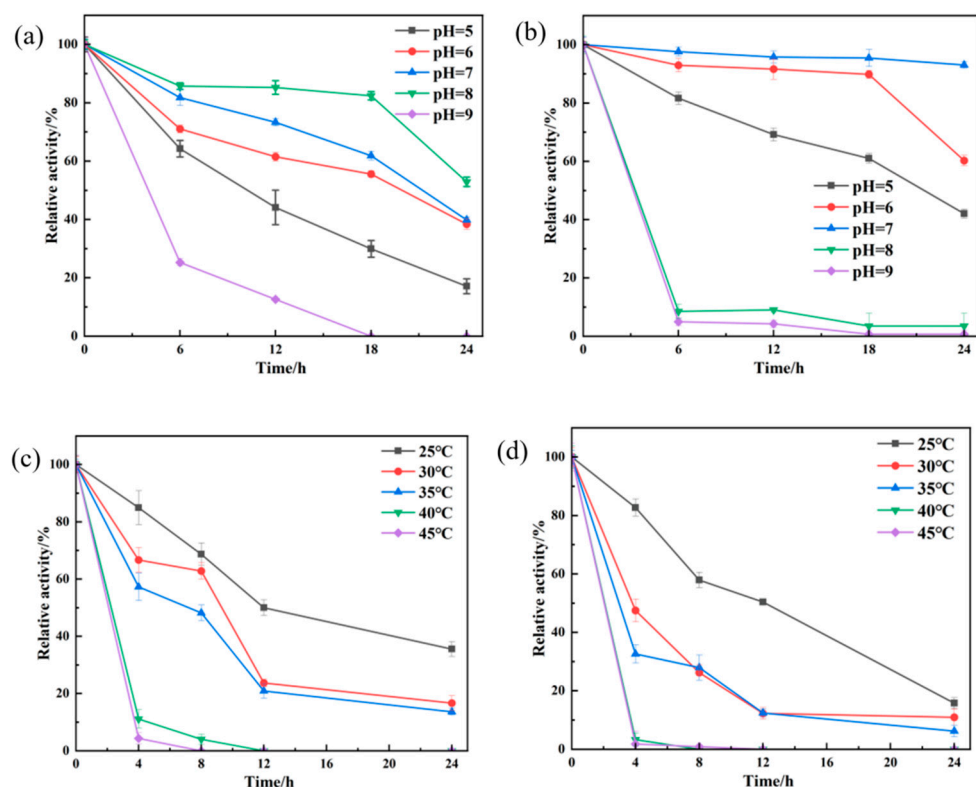

**Figure S5.** Effects of pH and temperature on BsCR-SpyTag and BsGDH-SnoopTag stability. (a) PH Stability of BsCR-SpyTag: various buffers of PH 5.0-9.0 for 24 hours at 4 °C. (b) The pH stability of BsGDH-SnoopTag: various buffers of pH 5.0-9.0 for 24 hours at 4 °C. (c) Temperature stability of BsCR-SpyTag: 25 °C, 30 °C, 35 °C, 40 °C and 45 °C, pH 7.0, 24 hours. (d) Temperature stability of BsGDH-SnoopTag: 25 °C, 30 °C, 35 °C, 40 °C and 45 °C, pH 7.0, 24 hours.

**Table S1.** Nucleic acid sequences of constructed fusion proteins:

| Gene name               | Nucleic acid sequences                                                                                                                                                                                                                                                                                                                                                             |
|-------------------------|------------------------------------------------------------------------------------------------------------------------------------------------------------------------------------------------------------------------------------------------------------------------------------------------------------------------------------------------------------------------------------|
| <i>Linker-SpyTag:</i>   | GGAGGCTCCGGATCCGCTGGCTCCGCTGCTGGTTCTGGCGAA<br>TTCCGTGGCGTTCCGCACATCGTTATGGTTGATGCGTATAAAC<br>GTTACAAA                                                                                                                                                                                                                                                                              |
| <i>Linker-SnoopTag:</i> | GAATTCGCCAGAACCAGCAGCGGAGCCAGCGGATCCGGAGC<br>CTCCAAGTTGGGTGACATCGAGTTCATCAAGGTCAACAAG                                                                                                                                                                                                                                                                                              |
| <i>SpyCatcher:</i>      | GTTACCACCCTGAGCGGCCTGAGCGGTGAACAGGGCCCGAG<br>CGGCGATATGACCACCGAAGAAGATAGCGCGACCCACATCA<br>AATTCAGCAAACGTGATGAAGATGGCCGTGAACTGGCGGGC<br>GCGACCATGGAAGTTCGTGATAGCAGCGGTAAACCATCAG<br>CACCTGGATTAGTGACGGCCACGTGAAAGACTTTTATCTGTAT<br>CCGGGTAAATATACCTTCGTTGAAACCGCTGCGCCGGATGGTT<br>ACGAAGTTGCGACCCCGATCGAATTCACCGTTAACGAAGATG<br>GTCAGGTTACCGTTGATGGTGAAGCGACCGAAGGTGATGCTC<br>ACACC |
| <i>SnoopCatcher:</i>    | AAACCGCTGCGTGGCGCGGTTTTCAGCCTGCAAAAACAGCA<br>CCCGGATTACCCGACATCTACGGCGCGATCGATCAGAACGG<br>CACCTACCAGAACGTTTCGTACCGGCGAAGATGGCAAACCTGA                                                                                                                                                                                                                                              |

CCTTCAAAAACCTGAGCGATGGCAAATACCGTCTGTTGAAA  
ACAGCGAACCGGCGGGCTACAAACCGGTTCAGAACAAACCG  
ATCGTTGCGTTCCAGATCGTTAACGGCGAAGTTTCGTGATGTTA  
CCAGCATCGTTCCGCAGGACATCCCGGCGACCTACGAATTTA  
CCAACGGCAAACACTACATCACCAACGAACCGATCCCGCCG  
AAA

*yueD:*

ATGGAAC TTTATATCATCACCGGAGCGTCAAAAAGGGCTGGGT  
CAAGCCATTGCATTACAGGCTTTAGAAAAGGGGCATGAAGTC  
CATGCCTTATCCAGAACGAAAACAGATGTCTCTCACAAAAAA  
CTAACGCAGCATCAAATAGACCTCATCAATCTCGAAGAAGCT  
GAACAGCAATTTGAAACATTGCTCTCATCCATCGATTGAGATC  
GTTATTCTGGTATTACCCTTATTAATAACGCCGGAATGGTAACG  
CCGATCAAACGTGCCGGCGAAGCGTCTCTTGACGAGCTTCAG  
CGCCATTATCAGCTGAACCTGACTGCGCCCGTGCTTTTGAGTC  
AGCTGTTTACAAAACGGTTTGCTTCATACAGCGGCAAAAAGA  
CGGTTGTCAACATTACTTCAGGAGCCGCCAAAAATCCATATA  
AGGGATGGAGCGCGTATTGCAGTTCAAAAAGCCGGGCTCGAC  
ATGTTTACGAGGACATTCGGATTTGAACAGGAGGATGAAGAG  
CTGCCGGTGAACATGATTTCTGTTCTCACCTGGAGTGATGGAC  
ACTGAGATGCAGGCCGTCATCCGTTCTTCATCGAAAAAGGAT  
TTCCACCACATTGAACGATTCCGGAAATTAAATGAAACAGGA  
AGCCTTCGCAGTCCGGACTTTATTGCCGGCACGCTGCTTTCTT  
TACTAGAAAAAGGGACGGAAAACGGCCGCATTTATGATATTA  
AAGAGTTTTTG

*bsgdh:*

ATGTATCCGGATTTAAAAGGAAAAGTCGTCGCTATTACAGGA  
GCTGCTTCAGGGCTCGGAAAGGCGATGGCCATTGCTTCGGC  
AAGGAGCAGGCAAAAAGTGGTTATCAACTATTATAGTAATAAA  
CAAGATCCGAACGAGGTAAAAGAAGAGGTCATCAAGGCGGG  
CGGTGAAGCTGTTGTCGTCCAAGGAGATGTCACGAAAGAGG  
AAGATGTAAAAAATATCGTGCAAACGGCAATTAAGGAGTTTCG  
GCACACTCGATATTATGATTAATAATGCCGGTCTTGAAAATCC  
TGTGCCATCTCACGAAATGCCGCTCAAGGATTGGGATAAAGT  
CATCGGCACGAACTTAACGGGTGCCTTTTTAGGAAGCCGTGA  
AGCGATTAAATATTTTCGTAGAAAACGATATCAAGGGAAATGT  
CATTAAACATGTCCAGTGTGCACGAAGTGATTCCTTGGCCGTTA  
TTTGTCCACTATGCGGCAAGTAAAGGCGGGATAAAGCTGATG  
ACAGAAACATTAGCGTTGGAATACGCGCCGAAGGGCATTTCG  
GTCAATAATATTGGGCCAGGTGCGATCAACACGCCAATCAAT  
GCTGAAAAATTGCTGACCCTAAACAGAAAGCTGATGTAGA  
AAGCATGATTCCAATGGGATATATCGGCGAACCGGAGGAGAT  
CGCCGCAGTAGCAGCCTGGCTTGCTTCGAAGGAAGCCAGCTA  
CGTCACAGGCATCACGTTATTCGCGGACGGCGGTATGACACA  
ATATCCTTCATTCCAGGCAGGCCGCGGT

*yueD-Linker-SpyTag:*

ATGGAAC TTTATATCATCACCGGAGCGTCAAAAAGGGCTGGGT

CAAGCCATTGCATTACAGGCTTTAGAAAAGGGGCATGAAGTC  
CATGCCTTATCCAGAACGAAAACAGATGTCTCTCACAAAAAA  
CTAACGCAGCATCAAATAGACCTCATCAATCTCGAAGAAGCT  
GAACAGCAATTTGAAACATTGCTCTCATCCATCGATTGAGATC  
GTTATTCTGGTATTACCCTTATTAATAACGCCGGAATGGTAACG  
CCGATCAAACGTGCCGCGGAAGCGTCTCTTGACGAGCTTCAG  
CGCCATTATCAGCTGAACCTGACTGCGCCCGTGCTTTTGAGTC  
AGCTGTTTACAAAACGGTTTGCTTCATACAGCGGCAAAAAGA  
CGGTTGTCAACATTACTTCAGGAGCCGCCAAAAATCCATATA  
AGGGATGGAGCGCGTATTGCAGTTCAAAAGCCGGGCTCGAC  
ATGTTTACGAGGACATTCGGATTTGAACAGGAGGATGAAGAG  
CTGCCGGTGAACATGATTTCTGTTCTCACCTGGAGTGATGGAC  
ACTGAGATGCAGGCCGTATCCGTTCTTCATCGAAAAAGGAT  
TTCCACCACATTGAACGATTCCGGAAATTAATGAAACAGGA  
AGCCTTCGCAGTCCGGACTTTATTGCCGGCACGCTGCTTTCTT  
TACTAGAAAAAGGGACGGAAAACGGCCGCATTTATGATATTA  
AAGAGTTTTTGGGAGGCTCCGGATCCGCTGGCTCCGCTGCTG  
GTTCTGGCGAATTCCGTGGCGTTCCGCACATCGTTATGGTTGA  
TGCGTATAAACGTTACAAA

*bsgdh-Linker-SnoopTag:*

ATGTATCCGGATTTAAAAGGAAAAGTCGTCGCTATTACAGGA  
GCTGCTTCAGGGCTCGGAAAGGCGATGGCCATTGCTTCGGC  
AAGGAGCAGGCAAAAGTGGTTATCAACTATTATAGTAATAAA  
CAAGATCCGAACGAGGTAAAAGAAGAGGTCATCAAGGCGGG  
CGGTGAAGCTGTTGTCGTCCAAGGAGATGTCACGAAAGAGG  
AAGATGTAAAAAATATCGTGCAAACGGCAATTAAGGAGTTTCG  
GCACACTCGATATTATGATTAATAATGCCGGTCTTGAAAATCC  
TGTGCCATCTCACGAAATGCCGCTCAAGGATTGGGATAAAGT  
CATCGGCACGAACTTAACGGGTGCCTTTTTAGGAAGCCGTGA  
AGCGATTAAATATTTTCGTAGAAAACGATATCAAGGGAAATGT  
CATTAAACATGTCCAGTGTGCACGAAGTGATTCCTTGGCCGTTA  
TTTGTCCACTATGCGGCAAGTAAAGGCGGGATAAAGCTGATG  
ACAGAAACATTAGCGTTGGAATACGCGCCGAAGGGCATTTCG  
GTCAATAATATTGGGCCAGGTGCGATCAACACGCCAATCAAT  
GCTGAAAAATTGCTGACCCTAAACAGAAAGCTGATGTAGA  
AAGCATGATTCCAATGGGATATATCGGCGAACCGGAGGAGAT  
CGCCGCAGTAGCAGCCTGGCTTGCTTCGAAGGAAGCCAGCTA  
CGTCACAGGCATCACGTTATTCGCGGACGGCGGTATGACACA  
ATATCCTTCATTCCAGGCAGGCCGCGGTGAATTCGCCAGAAC  
CAGCAGCGGAGCCAGCGGATCCGGAGCCTCCAAGTTGGGTG  
ACATCGAGTTTCATCAAGGTCAACAAG

**Table S2.** Amino acids sequences of constructed fusion proteins:

| Fusion protein name | Amino acids sequences |
|---------------------|-----------------------|
|---------------------|-----------------------|

|                  |                                                                                                                                                                                                                                                                                                                                                                       |
|------------------|-----------------------------------------------------------------------------------------------------------------------------------------------------------------------------------------------------------------------------------------------------------------------------------------------------------------------------------------------------------------------|
| Linker-SpyTag:   | GGSGSAGSAAGSGEFRGVPHIVMVDAYKRYK                                                                                                                                                                                                                                                                                                                                       |
| Linker-SnoopTag: | EFARTSSGASGSGASKLGDIEFIKVNK                                                                                                                                                                                                                                                                                                                                           |
| SpyCatcher:      | <u>MGSSHHHHHHSSGLVPRGSHMPTPTPTPTPTPTPTPTPTT</u> LSGLS<br>GEQGPSGDMTTEEDSATHIKFSKRDEDEGRELATMELRDSSGKTI<br>STWISDGHVKDFYLYPGKYTFVETAAPDGYEVATPIEFTVNEDGQV<br>TVDGEATEGDAHT                                                                                                                                                                                             |
| SnoopCatcher:    | <u>PTPTPTPTPTPTPTPTPTPT</u> KPLRGAVFSLQKQHPDYPDIYGAIQNGTY<br>QNVRTGEDGKLTFKNLSDGKYRLFENSEPAGYKPVQNKPIVAFQI<br>VNGEVRDVTISVPQDIPATYEFTNGKHITNEPIPPK <u>HHHHHH</u>                                                                                                                                                                                                      |
| BsCR:            | <u>MGSSHHHHHHSSGLVPRGSHMASMTGGQQMGRGSMELYIITGAS</u><br>KGLGQAIALQALEKGHEVHALSRTKTDVSHKKLTQHqidlinlee<br>AEQQFETLLSSIDSDRYSGITLINNAGMVTPIKRAGEASLDELQRHY<br>QLNLTAPVLLSQLFTKRFASYSgkktVVNITSgAAKNPYKGWSAY<br>CSSKAGLDMFTRTFGFEQEDEELPVNMISFSPGVMDTEMQAVIRSS<br>SKKDFHHIERFRKLNETGSLRSPDFIAGTLLSLLEKGTENGRIYDIKE<br>FL                                                  |
| BsGDH:           | <u>MGSSHHHHHHSSGLVPRGSHMASMTGGQQMGRGSMYPDLK GK</u><br>VVAITGAASGLGKAMAIRFGKEQAKVVINYYSNKQDPNEVKEEVI<br>KAGGEAVVVQGDVTKEEDVKNIVQTAIKEFGTLDIMINNAGLENP<br>VPSHEMPLKDWDKVIGTNLTGAFLGSREAIFYVENDIKGNVINM<br>SSVHEVIPWPLFVHYAASKGGIKLMTETLALEYAPKGIRVNNIGPG<br>AINTPINA EK FADPKQKADVESMIPMGYIGEPEEIAA VA AWLASKE<br>ASYVTGITLFADGGMTQYPSFQAGRG                            |
| BsCR-SpyTag:     | <u>MGSSHHHHHHSSGLVPRGSHMASMTGGQQMGRGSMELYIITGAS</u><br>KGLGQAIALQALEKGHEVHALSRTKTDVSHKKLTQHqidlinlee<br>AEQQFETLLSSIDSDRYSGITLINNAGMVTPIKRAGEASLDELQRHY<br>QLNLTAPVLLSQLFTKRFASYSgkktVVNITSgAAKNPYKGWSAY<br>CSSKAGLDMFTRTFGFEQEDEELPVNMISFSPGVMDTEMQAVIRSS<br>SKKDFHHIERFRKLNETGSLRSPDFIAGTLLSLLEKGTENGRIYDIKE<br>FLGSGSAGSAAGSGEFRGVPHIVMVDAYKRYK                    |
| BsGDH-SnoopTag:  | <u>MGSSHHHHHHSSGLVPRGSHMASMTGGQQMGRGSMYPDLK GK</u><br>VVAITGAASGLGKAMAIRFGKEQAKVVINYYSNKQDPNEVKEEVI<br>KAGGEAVVVQGDVTKEEDVKNIVQTAIKEFGTLDIMINNAGLENP<br>VPSHEMPLKDWDKVIGTNLTGAFLGSREAIFYVENDIKGNVINM<br>SSVHEVIPWPLFVHYAASKGGIKLMTETLALEYAPKGIRVNNIGPG<br>AINTPINA EK FADPKQKADVESMIPMGYIGEPEEIAA VA AWLASKE<br>ASYVTGITLFADGGMTQYPSFQAGRGEFARTSSGASGSGASKLGDIEFIKVNK |

**Table S3. Immobilization efficiency of the BsCR-SpyTag and BsGDH-SnoopTag**

| Immobilization efficiency of the BsCR-SpyTag | Immobilization efficiency of the BsGDH-SnoopTag |
|----------------------------------------------|-------------------------------------------------|
| 69.24%                                       | 69.96%                                          |
